# Supplementary material
Source: MDPI journal article supplement (https://www.mdpi.com/2071-1050/15/23/16330)
Supplement: s1 [file s1]

## Supplementary materials

| Site                                        | Upstream   |            |            |               |            | Midstream  |            |            |               |            | Downstream |            |            |            |            |
|---------------------------------------------|------------|------------|------------|---------------|------------|------------|------------|------------|---------------|------------|------------|------------|------------|------------|------------|
| Season                                      | Nov        | Apr        | May        | Aug           | Sep        | Nov        | Apr        | May        | Aug           | Sep        | Nov        | Apr        | May        | Aug        | Sep        |
| Maximum depth (m)                           | 6          | 6          | 7          | 6             | 6          | 10         | 10         | 10         | 12            | 12         | 6          | 6          | 6          | 6          | 6          |
| Water temperature (°C)                      | 12.7 ± 0.1 | 12.5 ± 0   | 22.3 ± 0.9 | 31.4 ± 1.2    | 23 ± 0     | 16.6 ± 0.1 | 15 ± 0     | 21.8 ± 0.4 | 32.3 ± 0.6    | 23.1 ± 0.1 | 13.9 ± 0.3 | 11.9 ± 0.4 | 20.3 ± 0.6 | 29.8 ± 0.4 | 22.6 ± 0.1 |
| NO <sub>3</sub> -N (mg L <sup>-1</sup> )    | 1.6 ± 0.4  | 3.8 ± 0.1  | 3 ± 0.2    | 2.6 ± 0.1     | 3 ± 0      | 3.2 ± 0    | 2.7 ± 0.2  | 2.5 ± 0.2  | 2.1 ± 0.2     | 2.7 ± 0.1  | 2.7 ± 0    | 3.8 ± 0    | 3 ± 0.2    | 2.2 ± 0    | 2.7 ± 0    |
| PO <sub>4</sub> -P (µg L <sup>-1</sup> )    | 22.2 ± 3.9 | 18.5 ± 2.1 | 7.6 ± 3.1  | 39.1 ± 9.1    | 53.9 ± 9.1 | 19.5 ± 1.7 | 8.4 ± 2.6  | 12.1 ± 1.3 | 58.6 ± 12.7   | 28.8 ± 7.3 | 30.1 ± 0.7 | 8.9 ± 3.5  | 10.7 ± 4.7 | 25.2 ± 5   | 30.1 ± 0.7 |
| SiO <sub>2</sub> (mg L <sup>-1</sup> )      | 0.4 ± 0.1  | 1.1 ± 0.1  | 0.4 ± 0    | 4.2 ± 0.2     | 6.1 ± 0.1  | 3.8 ± 0.4  | 1.6 ± 0.2  | 0.3 ± 0.1  | 3.4 ± 0.2     | 5.8 ± 0.1  | 6.4 ± 0.1  | 1.1 ± 0.7  | 0.7 ± 0.1  | 3.5 ± 0.1  | 6.4 ± 0.1  |
| Chlorophyll <i>a</i> (mg L <sup>-1</sup> )  | 4.6 ± 0.5  | 20.7 ± 4.8 | 6 ± 0.9    | 281.7 ± 174.4 | 10.9 ± 0.8 | 16 ± 0.2   | 26.5 ± 1.5 | 6.5 ± 0.7  | 121.5 ± 110.1 | 19.6 ± 2.9 | 10.6 ± 0.7 | 34 ± 2.4   | 4.3 ± 0.2  | 11 ± 2.6   | 8.4 ± 0    |
| Air temperature (°C)                        | 9.4        | 21.6       | 26.3       | 35.3          | 23.3       | 18.6       | 21         | 23.4       | 35.9          | 24.1       | 13.3       | 14.3       | 28.2       | 33         | 21.1       |
| Wind velocity (m s <sup>-1</sup> )          | 1          | 1.4        | 1.9        | 1.7           | 0.9        | 2          | 1.8        | 2.7        | 2             | 3.7        | 4.6        | 1.8        | 3.2        | 2.5        | 3.1        |
| Solar radiation (MJ m <sup>-2</sup> )       | 2.15       | 2.7        | 3.09       | 3.12          | 2.18       | 1.75       | 1.94       | 1.58       | 1.96          | 1.28       | 1.12       | 0.51       | 1.7        | 2.1        | 0.04       |
| Flow rate (m <sup>3</sup> s <sup>-1</sup> ) | -14.87     | 32.13      | 412.89     | 33.76         | 386.79     | 48.77      | 728.7      | 286.84     | 61.71         | 247.75     | 520.85     | 1,059.69   | 1,041.46   | 755.42     | 802.79     |
| Water level (m)                             | 3.73       | 4.82       | 4.98       | 4.87          | 4.96       | 0.65       | 0.95       | 0.75       | 0.73          | 0.99       | 0.42       | 0.64       | 0.63       | 0.5        | 0.52       |

**Table S1: Depth-averaged water characteristics and environmental factors of three sites during the study period (n = 3, mean ± S.E.).**

|      | Seasonal     |               |                |         | Diel          |               |                |         |
|------|--------------|---------------|----------------|---------|---------------|---------------|----------------|---------|
|      | PC1          | PC2           | r <sup>2</sup> | P-value | PC1           | PC2           | r <sup>2</sup> | P-value |
| RWCS | 0.684        | <b>-0.729</b> | 0.729          | 0.002   | 0.515         | <b>0.857</b>  | 0.758          | 0.001   |
| S    | <b>0.895</b> | -0.447        | 0.501          | 0.011   | <b>-0.874</b> | 0.486         | 0.777          | 0.001   |
| Max  | 0.561        | <b>-0.828</b> | 0.682          | 0.003   | 0.414         | <b>0.910</b>  | 0.779          | 0.001   |
| AT   | <b>0.964</b> | -0.268        | 0.699          | 0.002   | -0.144        | <b>0.990</b>  | 0.921          | 0.001   |
| SR   | 0.330        | <b>-0.944</b> | 0.743          | 0.002   | 0.242         | <b>0.970</b>  | 0.864          | 0.001   |
| WV   | -0.102       | 0.995         | 0.285          | 0.141   | -0.103        | <b>0.995</b>  | 0.694          | 0.001   |
| FR   | -0.641       | 0.768         | 0.252          | 0.184   | -0.672        | <b>-0.741</b> | 0.593          | 0.002   |
| WL   | 0.246        | -0.969        | 0.413          | 0.052   | <b>1.000</b>  | -0.014        | 0.970          | 0.001   |
| WT0  | <b>0.997</b> | -0.079        | 0.875          | 0.001   | -0.060        | <b>0.998</b>  | 0.848          | 0.001   |
| WT3  | <b>1.000</b> | 0.031         | 0.893          | 0.001   | <b>-0.885</b> | 0.466         | 0.415          | 0.015   |
| WTB  | <b>0.998</b> | 0.064         | 0.878          | 0.001   | <b>-0.998</b> | 0.057         | 0.734          | 0.001   |
| ChI0 | <b>0.884</b> | -0.467        | 0.658          | 0.003   | 0.468         | <b>0.884</b>  | 0.538          | 0.002   |
| ChI3 | 0.828        | -0.561        | 0.361          | 0.066   | 0.686         | <b>0.728</b>  | 0.646          | 0.001   |
| ChIB | -0.949       | -0.315        | 0.082          | 0.619   | <b>0.993</b>  | -0.122        | 0.471          | 0.005   |
| NO0  | -0.977       | -0.215        | 0.143          | 0.376   | 0.914         | -0.406        | 0.179          | 0.251   |
| NO3  | -0.993       | -0.116        | 0.231          | 0.184   | 0.653         | 0.757         | 0.267          | 0.108   |
| NOB  | -0.806       | 0.593         | 0.136          | 0.4     | -0.546        | 0.838         | 0.022          | 0.855   |
| PO0  | <b>1.000</b> | 0.009         | 0.673          | 0.002   | -0.547        | 0.837         | 0.254          | 0.109   |
| PO3  | <b>0.902</b> | 0.432         | 0.552          | 0.007   | -0.869        | 0.495         | 0.147          | 0.325   |
| POB  | <b>0.864</b> | 0.503         | 0.629          | 0.004   | <b>-0.969</b> | 0.246         | 0.533          | 0.004   |
| SI0  | 0.536        | <b>0.844</b>  | 0.862          | 0.001   | <b>0.917</b>  | -0.400        | 0.881          | 0.001   |
| SI3  | 0.447        | <b>0.894</b>  | 0.803          | 0.001   | <b>0.934</b>  | -0.356        | 0.888          | 0.001   |
| SIB  | 0.551        | <b>0.835</b>  | 0.878          | 0.002   | <b>0.753</b>  | -0.658        | 0.744          | 0.001   |

**Table S2: Pearson correlation coefficient of determination (r<sup>2</sup>) and P-values based on random permutations between the environmental variables and the PC coordinates at seasonal and diel scales (n = 15: seasonal, 18: diel). The bold values statistical significance ( $P < 0.05$ )**
